# Supplementary material for: DNA–Gold Nanozyme-Modified Paper Device for Enhanced Colorimetric Detection of Mercury Ions
Source: MDPI journal article supplement (doi:10.3390/bios10120211), 2020-12-18
Supplement: s1 [file s1]

# DNA-gold Nanozyme Modified Paper Device for Enhanced Colorimetric Detection of Mercury Ions

## Supplementary Material

### Preparation of AuNPs

The AuNPs were prepared by sodium citrate reduction method[1], as follows: the conical flask of the composite material was soaked in aqua regia for 24 h and then washed with ultrapure water. Briefly, in a conical flask, 2.5 mL 4g/L  $\text{HAuCl}_4$  was added into 97.5 mL ultrapure water, and heated to boiling while stirring. Then 2 mL of sodium citrate solution (1.0 %) was quickly added into the above mixture solution with vigorous stirring. After the burgundy was observed, the solution continued to be heated for 10 min, and then cooled down at room temperature, and stored at 4 °C for later use.

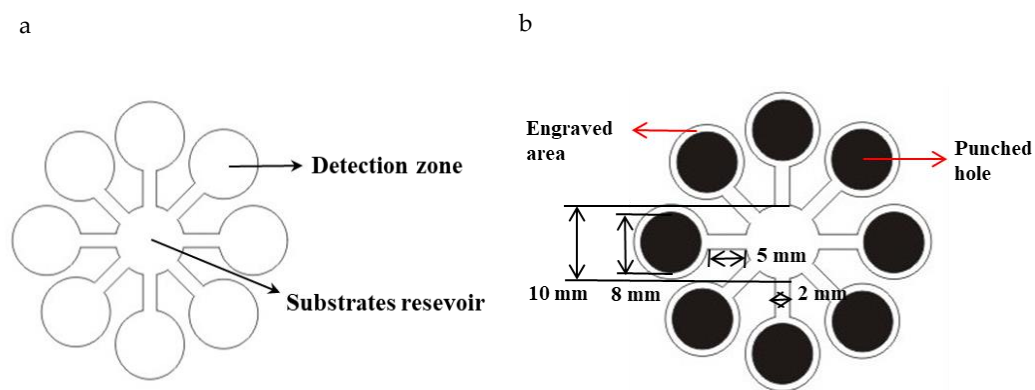

**Fig. S1.** Designed pattern of (a) paper chip and (b) base of the paper device.

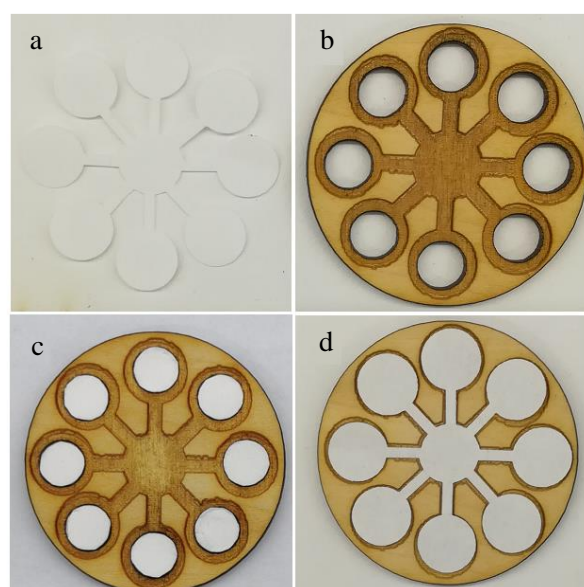

**Fig. S2.** Photographs of paper-based device. (a) paper chip; (b) wood base; (c) wood base filled with wicking pad and (d) paper device.

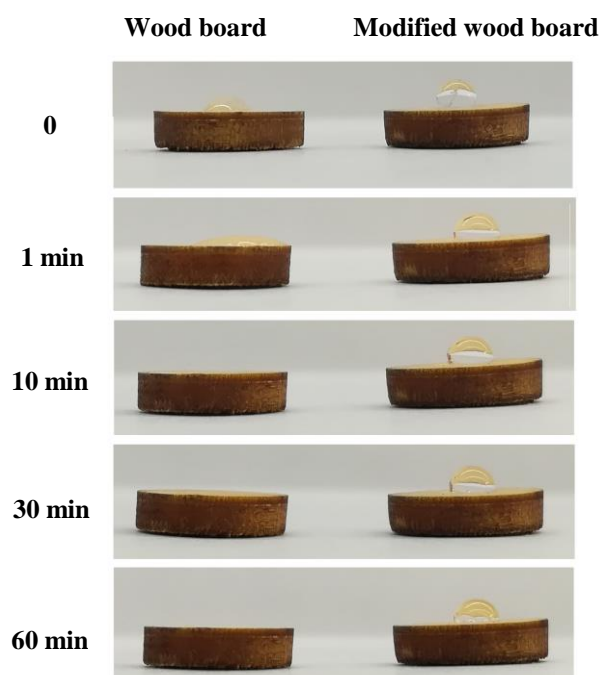

Fig. S3. Photograph of a water drop on wood board surface

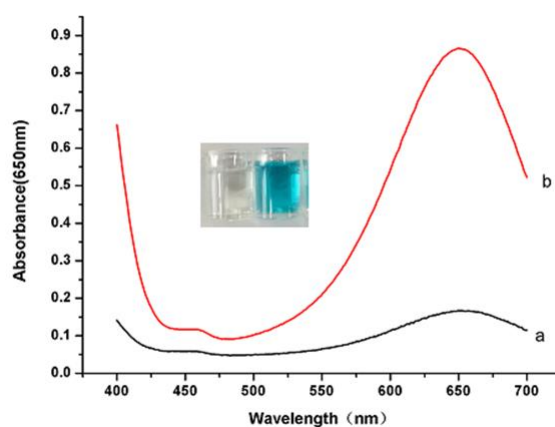

**Figure 4.** UV- vis absorption spectra of TMB-H<sub>2</sub>O<sub>2</sub> reaction. (a) DNA-AuNPs without Hg<sup>2+</sup>; (b) DNA-AuNPs with Hg<sup>2+</sup>

**Table S1 Comparison of paper-based devices for the detection of Hg<sup>2+</sup> reported in literatures**

| Method       | Reaction substrate | Detection probe | LOD of naked eye (nM) | Application          | Reference |
|--------------|--------------------|-----------------|-----------------------|----------------------|-----------|
| colorimetry  | filter paper       | AgNPs           | 600                   | drinking water       | [2]       |
| colorimetry  | NC membrane        | AuNPs-antibody  | 8.0                   | -                    | [3]       |
| Fluorescence | filter paper       | Rhodamine 6G    | 4980                  | -                    | [4]       |
| colorimetry  | NC membrane        | AuNPs-DNA       | 6.0                   | tap water            | [5]       |
| colorimetry  | filter paper       | AuNPs           | 500                   | tap water            | [6]       |
| colorimetry  | filter paper       | AuNPs           | 50                    | tap water、lake water | Our work  |

#### References

1. Peng, C.F.; Pan, N.; Xie, Z.J.; Wu, L.L. Highly sensitive and selective colorimetric detection of Hg<sup>2+</sup> based on the separation of Hg<sup>2+</sup> and formation of catalytic DNA–gold nanoparticles. *Anal. Methods* **2016**, *8*, 1021-1025.
2. Apilux, A.; Siangproh, W.; Praphairaksit, N.; Chailapakul, O. Simple and rapid colorimetric detection of Hg(II) by a paper-based device using silver nanoplates. *Talanta* **2012**, *97*, 388-394.
3. Zhou, Y.; Li, Y.-S.; Meng, X.-Y.; Zhang, Y.-Y.; Yang, L.; Zhang, J.-H.; Wang, X.-R.; Lu, S.-Y.; Ren, H.-L.; Liu, Z.-S. Development of an immunochromatographic strip and its application in the simultaneous determination of Hg(II), Cd(II) and Pb(II). *Sens. Actuator B-Chem.* **2013**, *183*, 303-309.
4. Patidar, R.; Rebarry, B.; Paul, P. Colorimetric and Fluorogenic Recognition of Hg<sup>2+</sup> and Cr<sup>3+</sup> in Acetonitrile and their Test Paper Recognition in Aqueous Media with the Aid of Rhodamine Based Sensors. *J. Fluoresc.* **2015**, *25*, 387-395.
5. Yang, F.; Duan, J.; Li, M.; Wang, Z.; Guo, Z. Visual and On-site Detection of Mercury(II) Ions on Lateral Flow Strips Using DNA-functionalized Gold Nanoparticles. *Anal. Sci.* **2012**, *28*, 333-338.
6. Han, K.N.; Choi, J.-S.; Kwon, J. Gold nanozyme-based paper chip for colorimetric detection of mercury ions. *Sci Rep* **2017**, *7*.
